# Supplementary material
Source: PubMed Central journal article supplement (PMC5992322)

A

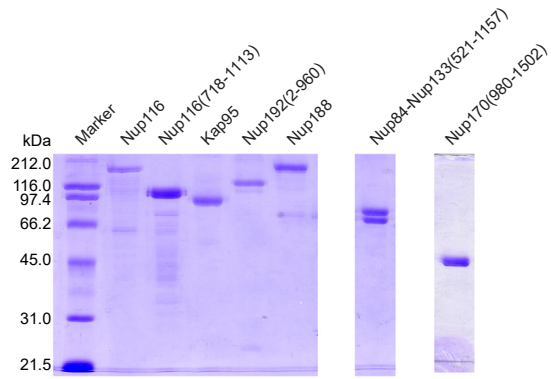

C

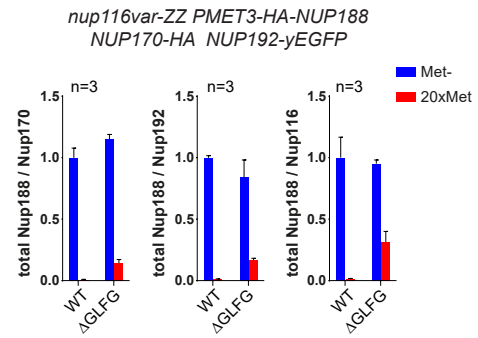

B

| analyte                 | Probe             | $K_{D1}$     | $K_{D2}$     | $kon1$ [ $M^{-1}s^{-1}$ ] | $koff1$ [ $s^{-1}$ ]  | $kon2$ [ $M^{-1}s^{-1}$ ] | $koff2$ [ $s^{-1}$ ]  | kinetic1: kinetic2 |
|-------------------------|-------------------|--------------|--------------|---------------------------|-----------------------|---------------------------|-----------------------|--------------------|
| Kap95                   | Nup116            | 801 pM       | 9.42 nM      | $1.39 \times 10^6$        | $1.11 \times 10^{-3}$ | $5.97 \times 10^6$        | $5.62 \times 10^{-2}$ | 50:50              |
| Nup192 (2-960)          | Nup116            | 500 nM       | 38.8 nM      | $1.28 \times 10^5$        | $6.42 \times 10^{-2}$ | $1.14 \times 10^5$        | $4.43 \times 10^{-3}$ | 95:5               |
| Nup192 (2-960)          | Nup116 (718-1113) | 7.58 $\mu$ M | 1.44 $\mu$ M | $1.60 \times 10^4$        | $1.21 \times 10^{-1}$ | $3.09 \times 10^3$        | $4.46 \times 10^{-3}$ | 90:10              |
| Nup188                  | Nup116            | 483 nM       | 262 nM       | $1.10 \times 10^5$        | $5.31 \times 10^{-2}$ | $1.64 \times 10^6$        | $4.30 \times 10^{-3}$ | 95:5               |
| Nup170 (980-1502)       | Nup116            | 147 nM       | 127 nM       | $3.47 \times 10^4$        | $5.09 \times 10^{-3}$ | $1.67 \times 10^6$        | $2.13 \times 10^{-1}$ | 80:20              |
| Nup84-Nup133 (521-1157) | Nup116            | 5.1 nM       | 15.6 nM      | $3.56 \times 10^5$        | $1.81 \times 10^{-3}$ | $7.95 \times 10^6$        | $1.24 \times 10^{-1}$ | 60:40              |

D

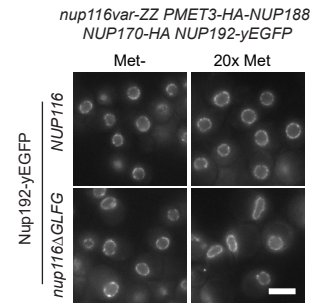

E

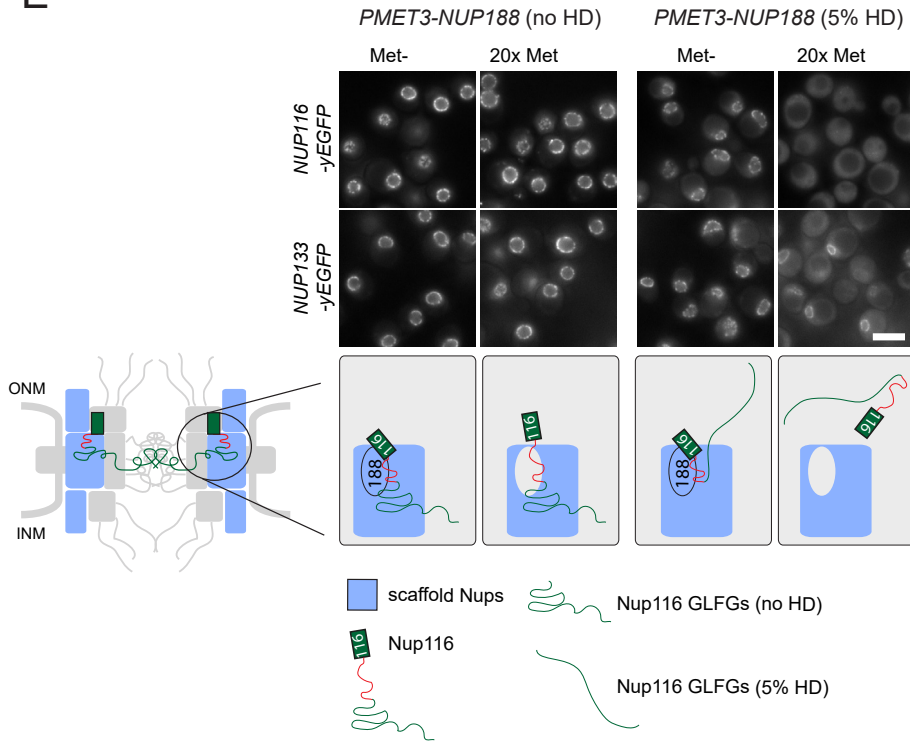

Supplement: NIHMS911640-supplement-4.pdf [file NIHMS911640-supplement-4.pdf]
