# Supplementary material
Source: PubMed Central journal article supplement (PMC5992322)

A

assign nuclear envelope masks based on HDEL

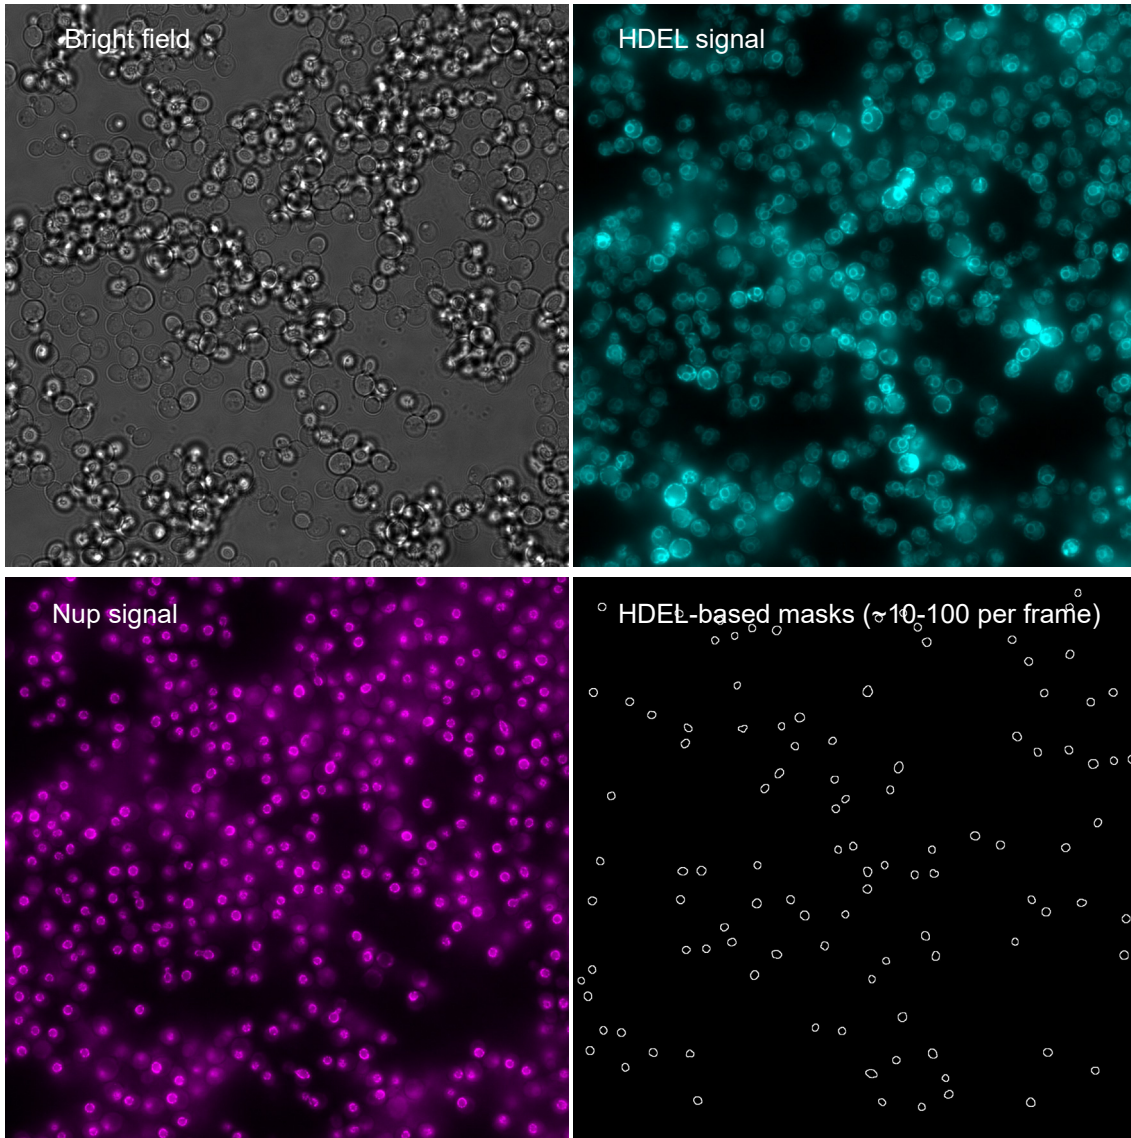

B

Quantify GFP signal inside the nucleus ( $I_N$ ), in the cytoplasm ( $I_C$ ), and at the nuclear envelope ( $I_{NE}$ ) based on the masks

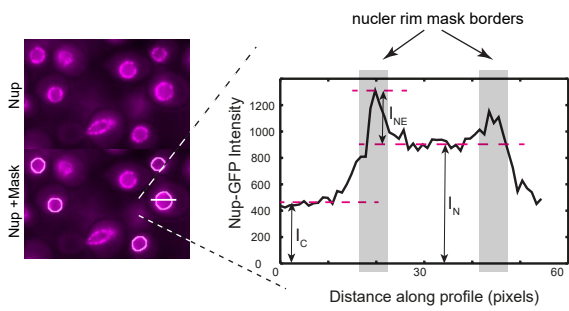

C

calculate median values for the contours within image frame (10-100 masks)

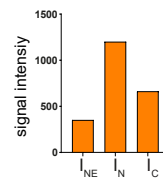

D

average values from ~25-50 frames (500-5000 masks)

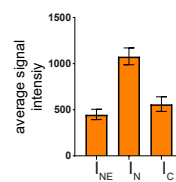

Supplement: NIHMS911640-supplement-5.pdf [file NIHMS911640-supplement-5.pdf]
