# Supplementary material
Source: PubMed Central journal article supplement (PMC5992322)

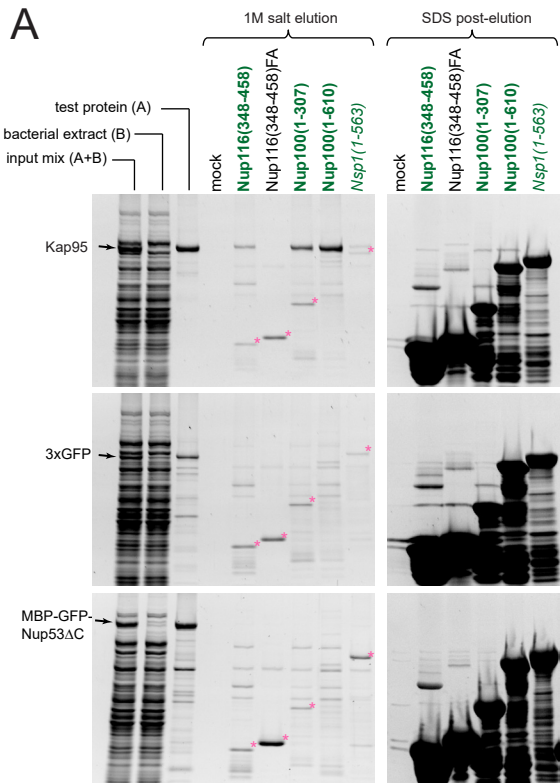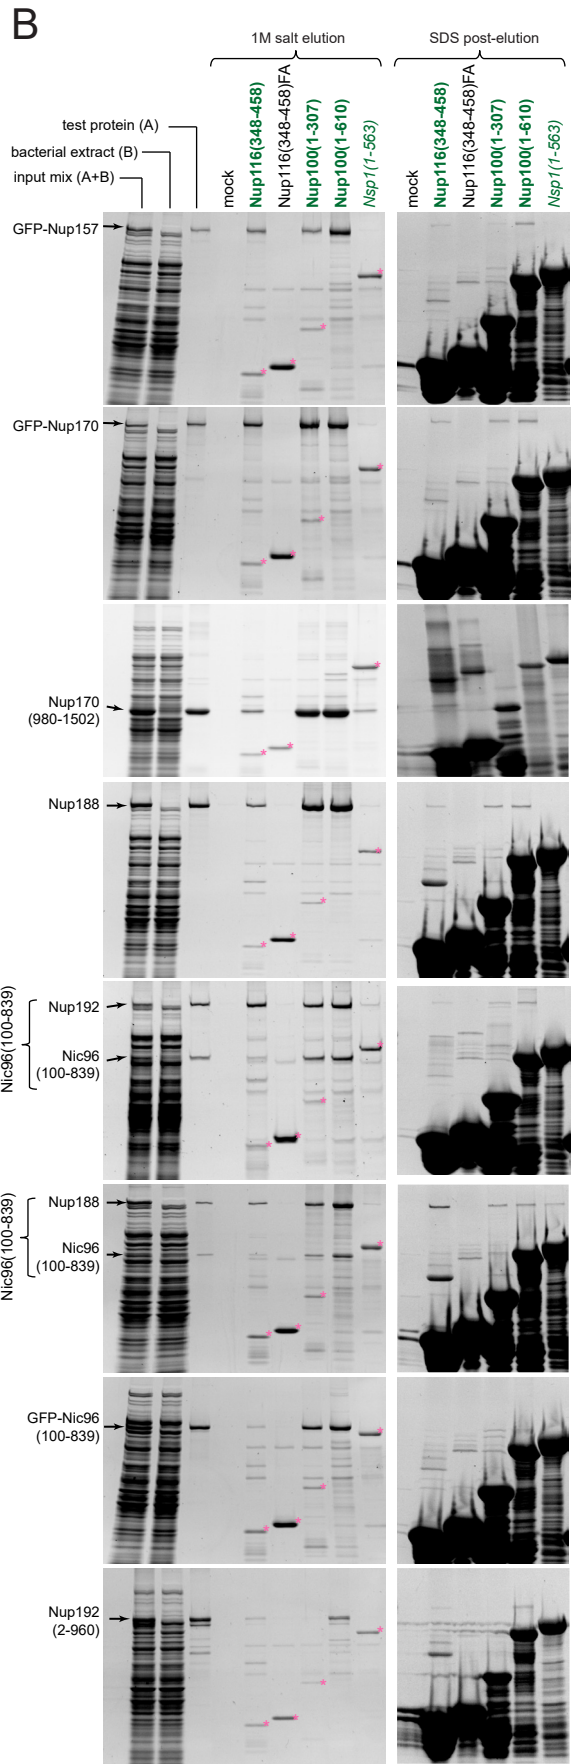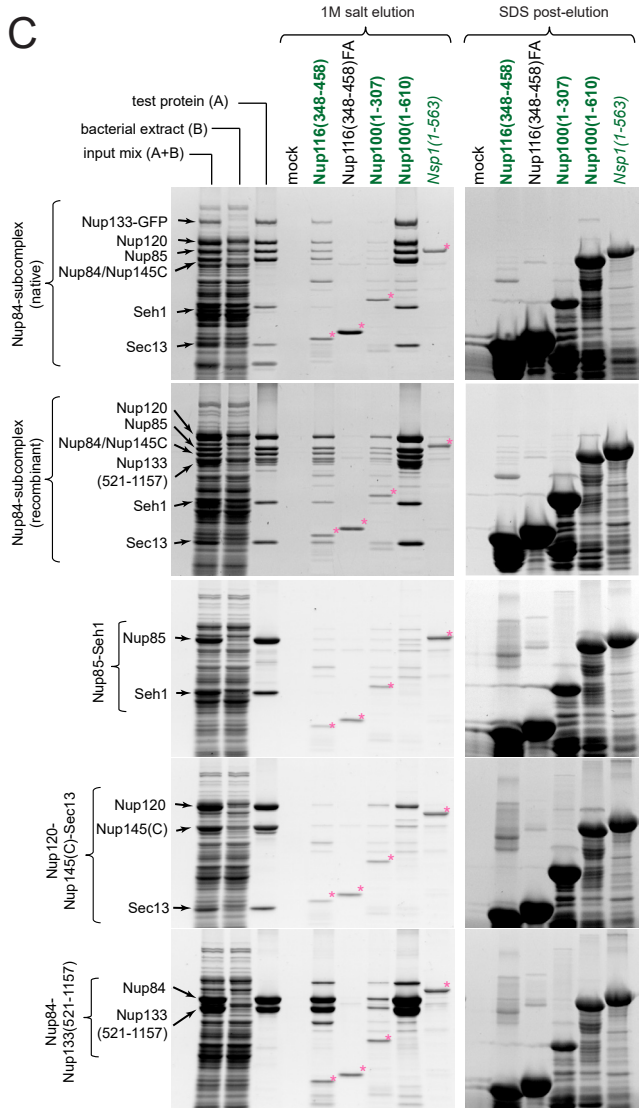

(\*) - co-eluted FG-repeat bait

Supplement: NIHMS911640-supplement-2.pdf [file NIHMS911640-supplement-2.pdf]

A

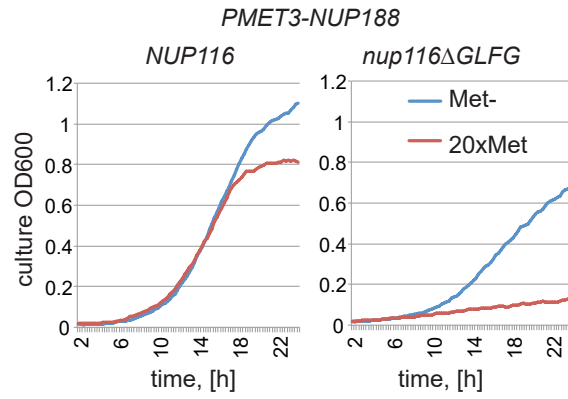

B

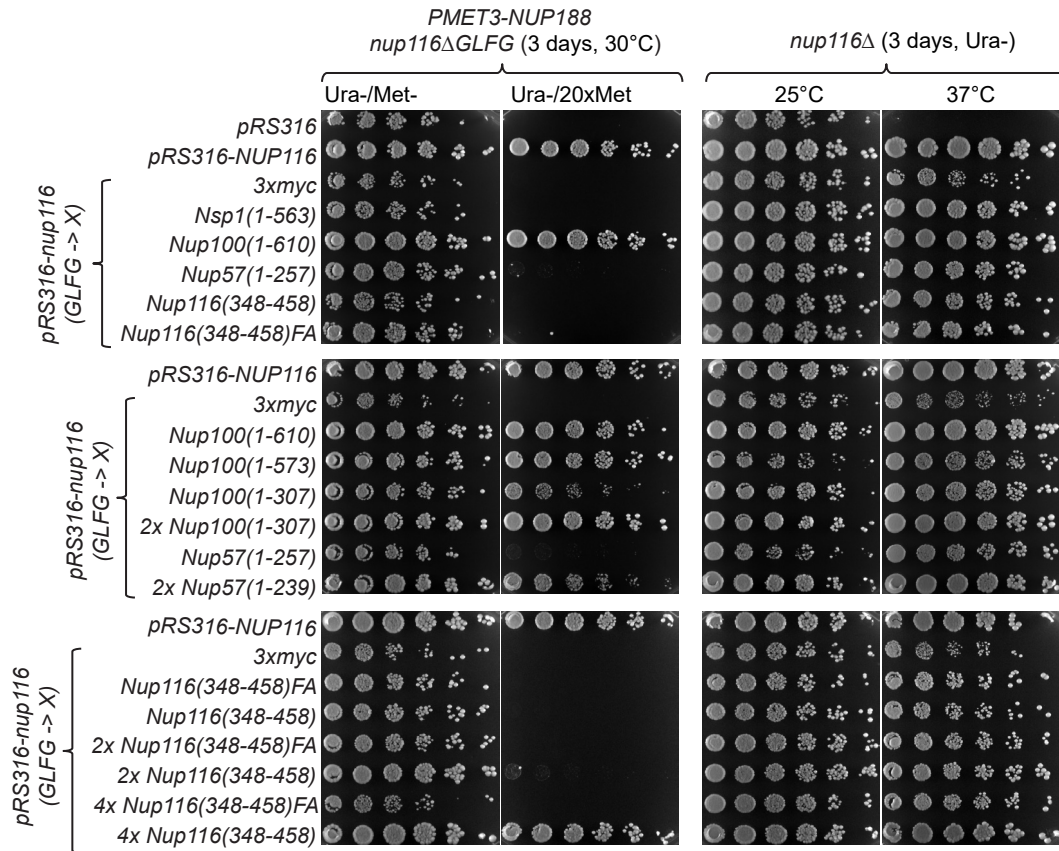

Supplement: NIHMS911640-supplement-3.pdf [file NIHMS911640-supplement-3.pdf]

**A**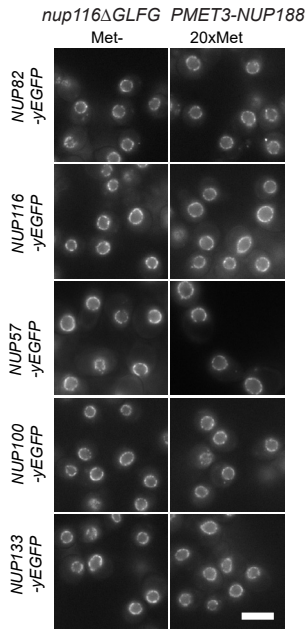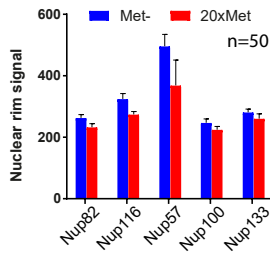**B**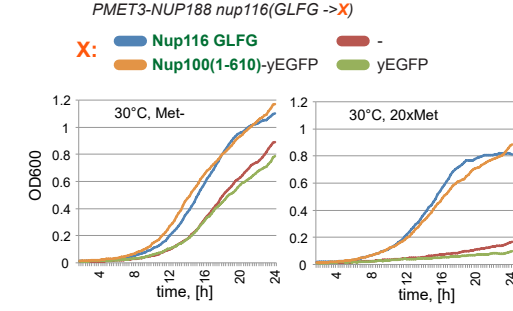**C**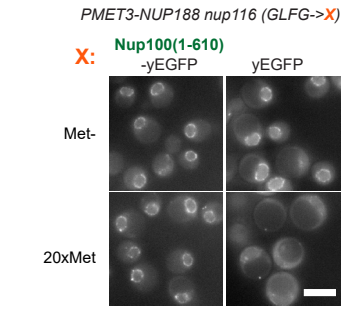**D**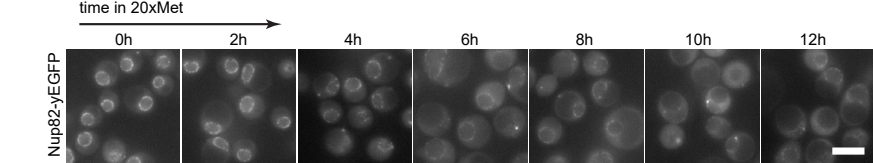**E**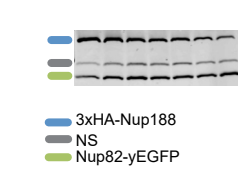**F**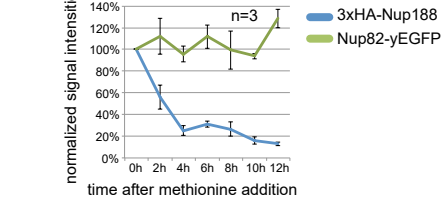**G**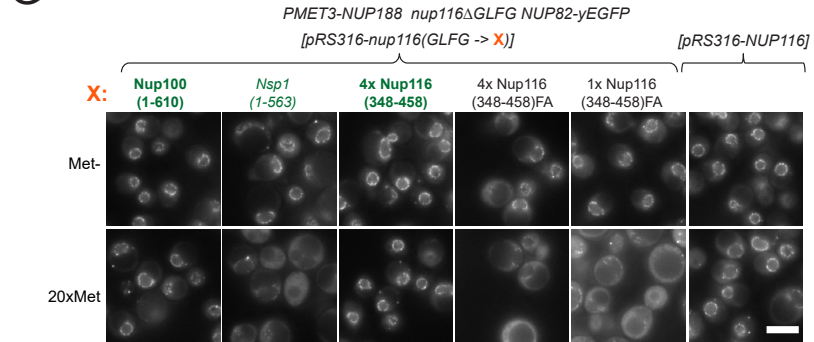**H**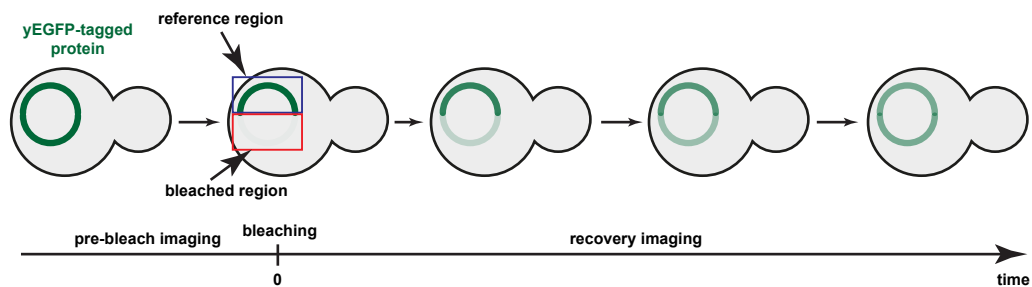**I**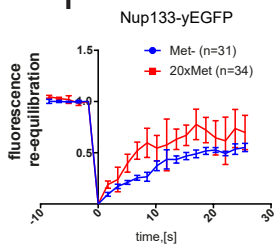**J**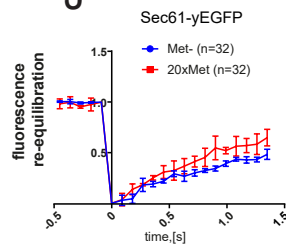**K**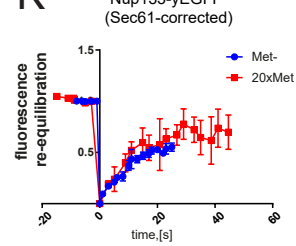

Supplement: NIHMS911640-supplement-6.pdf [file NIHMS911640-supplement-6.pdf]

A

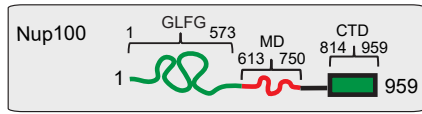

B

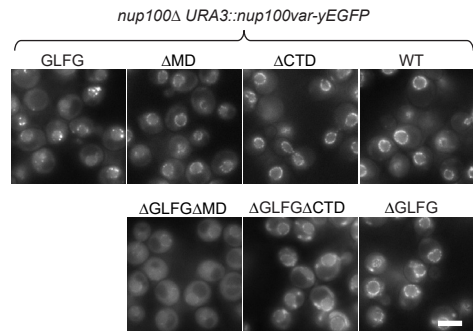

D

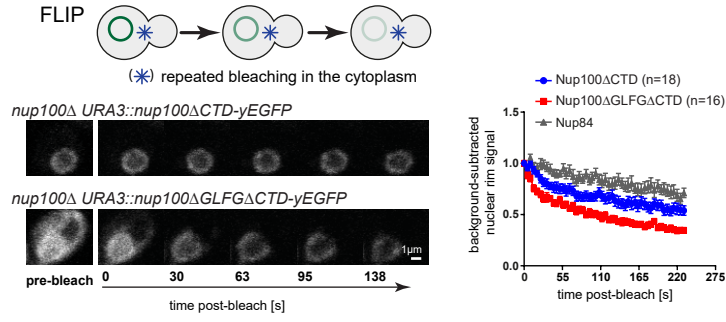

C

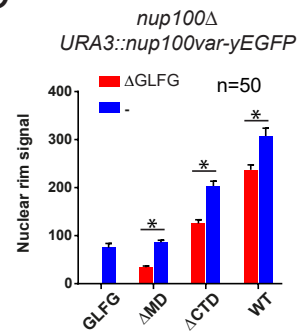

E

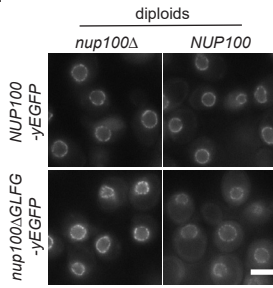

F

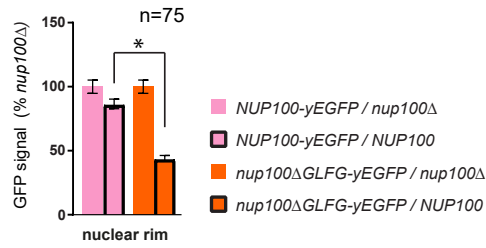

Supplement: NIHMS911640-supplement-7.pdf [file NIHMS911640-supplement-7.pdf]
